# MIND TO MIND

*Creative writing that explores the abstract side  
of our profession and our lives*

*Carol Wiley Cassella, M.D., Editor*

## The Line

Conrad S. Myler, M.D.

Pacing, staring, slumping 'midst the beeping,  
they are so focused on The Line.  
Is she alive? Don't let her be dead.  
They imagine The Line as a switch, not a dimmer.

I see lines cast by a prism of glass at sunset  
while hearts march on from red through violet.  
The rubor of a foreign invasion,  
or amber urine from dehydration,  
jaundice of a single duct dammed,  
purulence with virulence selected by man,  
to the cyan of cells gasping for air,  
or a purple mass she'd prefer laissez faire.

While sitting, waiting, watching each shade,  
it's as hard as declaring the end of a day  
when the sun is gone, is it yet fully dark?  
Until they drift downstairs, and cross the street to the park  
where children play, and couples lay,  
and old men gray in trousers frayed.  
There this spectrum converges  
into bright white light.

The author thanks Doug Hester, M.D., and Stephen Harvey, M.D. (both from the Department of Anesthesiology, Vanderbilt University Medical Center, Nashville, Tennessee), for their listening ears, insightful reviews, gentle prodding, and examples of balance.

From the Vanderbilt University Medical Center, Nashville, Tennessee. conrad.s.myler@vanderbilt.edu

Accepted for publication January 29, 2014.

Copyright © 2014, the American Society of Anesthesiologists, Inc. Lippincott Williams & Wilkins. Anesthesiology 2014; 121:660
